# Supplementary material
Source: Springer Nature journal article supplement (https://www.springermedizin.de/resource/supplementary/12885_2010_2720_MOESM1_ESM.pdf/9461842)
Supplement: MOESM1 [file 9461842]

| (A)            | MT            | WT  | total     |
|----------------|---------------|-----|-----------|
| cell lines     | 503           | 68  | 571       |
| tumour samples | 289           | 163 | 452       |
| all groups     | 792           | 231 | 1023      |
|                | $X^2 - 84.19$ |     | $p=4E-20$ |

| (B)            | ROH 17p       | LOH 17p | total     |
|----------------|---------------|---------|-----------|
| cell lines     | 111           | 460     | 571       |
| tumour samples | 184           | 266     | 450       |
| all groups     | 295           | 726     | 1021      |
|                | $X^2 - 56.36$ |         | $p=6E-14$ |

| (C)        | 1 <i>TP53</i> mutation | >1 <i>TP53</i> mutation | total      |
|------------|------------------------|-------------------------|------------|
| cell lines | 522                    | 50                      | 572        |
| surgery    | 535                    | 31                      | 566        |
| all groups | 1057                   | 82                      | 1138       |
|            | $X^2 - 4.59$           |                         | $p=0.0323$ |

| (D)            | all <i>TP53</i> mutations within exons 5-8 | at least one <i>TP53</i> mutation outside exons 5-8 | total      |
|----------------|--------------------------------------------|-----------------------------------------------------|------------|
| cell lines     | 26                                         | 19                                                  | 45         |
| tumour samples | 31                                         | 14                                                  | 45         |
| all groups     | 57                                         | 33                                                  | 90         |
|                | $X^2 - 1.20$                               |                                                     | $p=0.2741$ |

MT-mutated type WT-wild type  
ROH-retention of heterozygosity LOH-loss of heterozygosity

| (E)            |          | MT  | WT           | total      |
|----------------|----------|-----|--------------|------------|
|                | missense | 378 | 55           | 433        |
| cell lines     | nonsense | 125 | 13           | 138        |
|                | total    | 503 | 69           | 571        |
|                |          |     | $X^2 - 1.07$ | $p=0.3000$ |
| tumour samples | missense | 219 | 129          | 348        |
|                | nonsense | 69  | 34           | 103        |
|                | total    | 288 | 163          | 451        |
|                |          |     | $X^2 - 0.57$ | $p=0.4513$ |

| (F)       |            | MT | WT            | total      |
|-----------|------------|----|---------------|------------|
|           | cell lines | 24 | 1             | 25         |
| codon 175 | tumour s.  | 15 | 6             | 21         |
|           | total      | 39 | 7             | 46         |
|           |            |    | $X^2 - 5.34$  | $p=0.0208$ |
|           | cell lines | 53 | 8             | 61         |
| codon 248 | tumour s.  | 14 | 12            | 26         |
|           | total      | 67 | 20            | 87         |
|           |            |    | $X^2 - 11.24$ | $p=0.0008$ |
|           | cell lines | 53 | 7             | 60         |
| codon 273 | tumour s.  | 33 | 16            | 49         |
|           | total      | 86 | 23            | 109        |
|           |            |    | $X^2 - 7.14$  | $p=0.0076$ |
|           | cell lines | 20 | 5             | 25         |
| R273C     | tumour s.  | 17 | 5             | 22         |
|           | total      | 37 | 10            | 47         |
|           |            |    | $X^2 - 0.05$  | $p=0.8197$ |
|           | cell lines | 36 | 2             | 38         |
| R273X     | tumour s.  | 16 | 11            | 27         |
|           | total      | 52 | 13            | 65         |
|           |            |    | $X^2 - 12.42$ | $p=0.0004$ |
